# Supplementary material for: Complications of pneumothorax in computed tomography-guided transthoracic needle biopsy and prognostic factors: study on patients with tumor-like lung lesions
Source: PubMed Central journal article supplement — J Thorac Dis. 2024 Nov 29;16(11):7499–510. doi: 10.21037/jtd-24-955 (PMC11635216; doi:10.21037/jtd-24-955), 2024-11-29
Supplement: jtd-16-11-7499-dss.pdf [file jtd-16-11-7499-dss.pdf]

## Data Sharing Statement

|                     |                                                                                                                                                     |                                                                                                                           |
|---------------------|-----------------------------------------------------------------------------------------------------------------------------------------------------|---------------------------------------------------------------------------------------------------------------------------|
| <b>Article Info</b> | <a href="https://dx.doi.org/10.21037/jtd-24-955">https://dx.doi.org/10.21037/jtd-24-955</a>                                                         |                                                                                                                           |
| <b>Item</b>         | <b>Question</b>                                                                                                                                     | <b>Authors' Response<br/>(place "-" if not applicable)</b>                                                                |
| 1                   | Would you like to share data collected for your study to others?                                                                                    | Yes                                                                                                                       |
| 2                   | If not, would you like to share the reason for your decision?                                                                                       | -                                                                                                                         |
| 3                   | What data in particular will be shared?                                                                                                             | Data table containing the deidentified information mentioned in the study.                                                |
| 4                   | Any other documents will be shared? Such as study protocol, statistical analysis plan, informed consent form, clinical study report, analytic code. | No.                                                                                                                       |
| 5                   | When will data availability begin?                                                                                                                  | From the publication date.                                                                                                |
| 6                   | When will data availability end?                                                                                                                    | Two years within the publication date, since the technique or complication data may be updated over time.                 |
| 7                   | To whom will you share the data?                                                                                                                    | Medical oncologists, pulmonologists and interventional radiologist who are interested in studies of transthoracic biopsy. |
| 8                   | For what type of analysis or purpose?                                                                                                               | For analysis to evaluate the transthoracic biopsy's complications and predictors of them.                                 |
| 9                   | How or where can the data/documents be obtained?                                                                                                    | Emails could be sent to the address below to obtain the shared data: Ba.tungyds@gmail.com                                 |
| 10                  | Any other restrictions?                                                                                                                             | We may balance the potential benefits and risks for each request and then provide the data that could be shared.          |
